# Supplementary material for: Self-assembly of amphiphilic random co-poly(ionic liquid)s: the effect of anions, molecular weight, and molecular weight distribution
Source: Royal Society of Chemistry journal article supplement (doi:10.1039/c3py00460k), 2013-01-01
Supplement: c3py00460k.pdf [file c3py00460k.pdf]

## Electronic Supplementary Information

### Self-Assembly of Amphiphilic Random Co-poly(ionic liquid)s: the Effect of Anions, Molecular Weight, and Molecular Weight Distribution

Jiangna Guo, Yinxia Zhou, Lihua Qiu, Chao Yuan and Feng Yan \*

Jiangsu Key Laboratory of Advanced Functional Polymer Design and Application, Department  
of Polymer Science and Engineering, College of Chemistry, Chemical Engineering and  
Materials Science, Soochow University, Suzhou, 215123, PR China

E-mail: [fyan@suda.edu.cn](mailto:fyan@suda.edu.cn)

**Table S1** The molecular weight ( $M_n$ ) and molecular weight distribution ( $M_n/M_w$ ) of PCMS prepared via reversible addition fragmentation chain transfer (RAFT) polymerization of p-chloromethyl styrene in toluene at 60 °C for 7 h.

| Entry | [M]:[BCCDT]:[AIBN] | Conversion(%) | $M_{n,GPC}$ (g/mol) | $M_n/M_w$ |
|-------|--------------------|---------------|---------------------|-----------|
| a     | 100:2:5            | 86.7          | 4200                | 2.14      |
| b     | 600:6:1            | 74.2          | 7100                | 1.27      |
| c     | 500:6:1            | 70.8          | 8050                | 1.31      |
| d     | 1000:6:1           | 76.3          | 9900                | 1.33      |
| e     | 100:5:1            | 73.7          | 1300                | 1.32      |
| f     | 500:5:1            | 88.6          | 14200               | 1.85      |

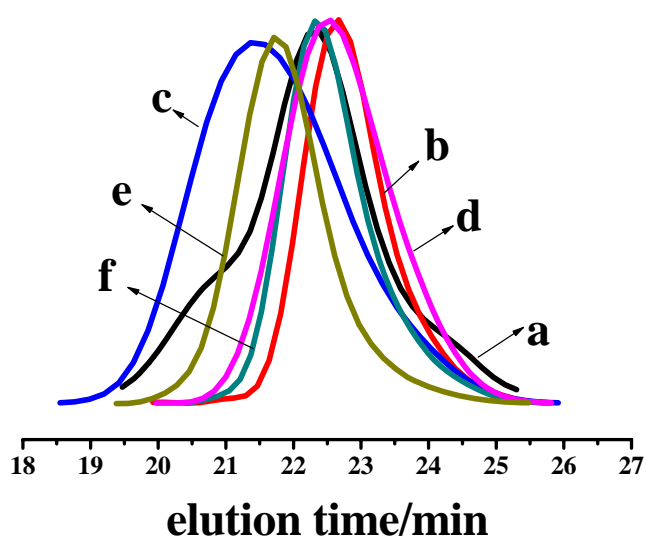

**Fig. S1** Typical GPC traces of PCMS prepared via RAFT polymerization (as described in Table S1).

**Table S2** Theoretical and experimental composition of the synthesized random ionic copolymer PIL-[Cl]<sub>x</sub>[PF<sub>6</sub>]<sub>y</sub> ( $M_n = 7100$ ,  $M_w/M_n = 1.27$ ).

| entry | PIL-[Cl] <sub>x</sub> [PF <sub>6</sub> ] <sub>y</sub>  | [Cl <sup>-</sup> ]/[PF <sub>6</sub> <sup>-</sup> ] feed ratio | [Cl <sup>-</sup> ]/[PF <sub>6</sub> <sup>-</sup> ] experimental ratio |
|-------|--------------------------------------------------------|---------------------------------------------------------------|-----------------------------------------------------------------------|
| 1     | PIL-[Cl] <sub>18</sub> [PF <sub>6</sub> ] <sub>2</sub> | 9/1                                                           | 8.54/1                                                                |
| 2     | PIL-[Cl] <sub>18</sub> [PF <sub>6</sub> ] <sub>3</sub> | 6/1                                                           | 5.88/1                                                                |
| 3     | PIL-[Cl] <sub>18</sub> [PF <sub>6</sub> ] <sub>6</sub> | 3/1                                                           | 2.58/1                                                                |

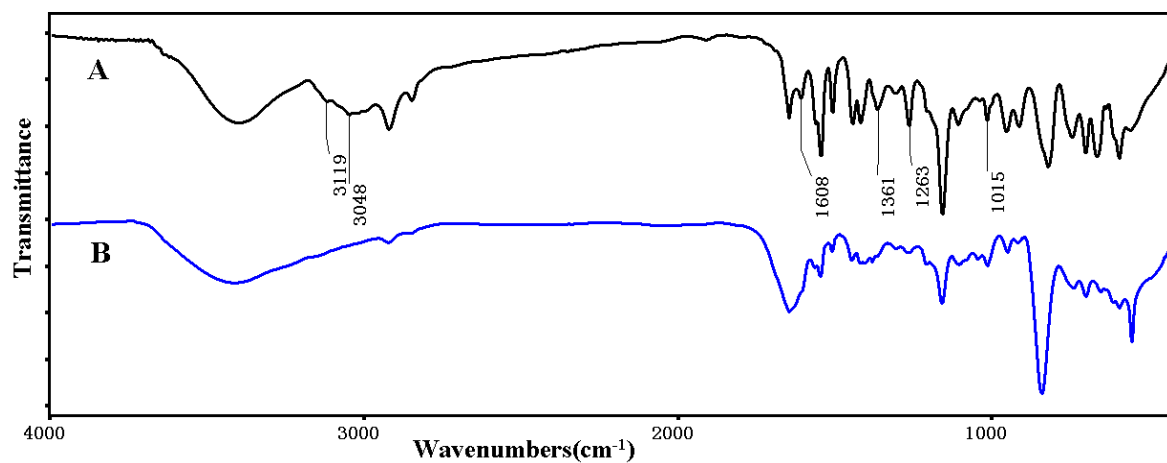

**Fig. S2** FT-IR spectra of vinylimidazole-based PIL-[Cl]<sub>18</sub>[PF<sub>6</sub>]<sub>2</sub> ( $M_n=8050$ ,  $M_w/M_n=1.31$ ) before (A) and after (B) self-assembly in aqueous solution.
